# Supplementary material
Source: Royal Society of Chemistry journal article supplement (doi:10.1039/d6ja00131a)
Supplement: d6ja00131a1.pdf [file d6ja00131a1.pdf]

*Electronic Supplementary Material (ESI) for Journal of Analytical Atomic Spectrometry.  
This journal is © The Royal Society of Chemistry 2026.*

**Electronic Supplementary Information for:  
Laser-induced breakdown spectroscopy for cancer diagnosis  
and intraoperative feedback**

Yikang Hou, Zhuoxi Li, Jie Lian\*

*School of Investigation, People's Public Security University of China,  
Beijing 100038, China*

\*Corresponding author: [rlianjie@163.com](mailto:rlianjie@163.com)

This Electronic Supplementary Information contains the detailed reporting checklist and tabular implementation roadmap that support the revised Critical Review.

**Table S1:** Minimum reporting checklist for clinically oriented oncologic LIBS studies. Priority: M, must report; S, should report; R, recommended for translational or deployment-oriented studies.

| Reporting domain                 | Priority | Minimum information to report                                                                                                                                                             | Why it matters clinically                                                                                                |
|----------------------------------|----------|-------------------------------------------------------------------------------------------------------------------------------------------------------------------------------------------|--------------------------------------------------------------------------------------------------------------------------|
| Patient and pathology definition | M        | Number of patients, specimens, spectra, spots, and images; tumor type and grade; adjacent tissue definition; pathology reference and blinding status                                      | Prevents spectrum-level sample inflation and clarifies whether labels reflect clinically valid ground truth              |
| Sample state and preparation     | M        | Fresh, frozen, paraffin, dried drop, substrate, drying time, storage time, thaw cycles, section thickness, cleaning shots, and surface handling                                           | Controls matrix effects and identifies whether the experiment is pathology-suite, laboratory, or operating-room relevant |
| Instrument and plasma window     | M        | Laser wavelength, pulse duration, energy at sample, spot size or fluence, repetition rate, gate delay, gate width, atmosphere, spectrometer range, and calibration checks                 | Determines ablation mass, plasma temperature, line broadening, continuum background, and reproducibility                 |
| Spectral preprocessing and QC    | M        | Baseline correction, denoising, normalization, peak integration, internal standard, feature selection, failed-spectrum policy, and whether each step was fitted within training data only | Prevents information leakage and allows another laboratory to reproduce the decision pipeline                            |
| Validation design                | M        | Patient-grouped split, batch holdout, external center or temporal validation, model locking, class balance, confidence intervals, and patient- or region-level confusion matrices         | Distinguishes proof-of-concept performance from clinically relevant generalization                                       |
| Class imbalance and augmentation | S        | Pre-specified balancing method, whether augmentation was applied after patient grouping, class-specific sensitivity/specificity, and treatment of rare classes                            | Avoids spectrum-level or synthetic-sample leakage that can be especially severe in biofluid LIBS                         |
| Model interpretation             | S        | Wavelength-level importance, permutation importance, SHAP-type attribution, or equivalent explanation linked to chemically plausible variables                                            | Helps determine whether the classifier uses disease biology rather than substrate, batch, or patient identity            |
| Clinical endpoint and use case   | M        | Tissue attribution, margin distance, triage, subtype, stage, treatment response, or closed-loop stopping; latency and tolerated false-negative rate                                       | Aligns the analytical claim with the decision that a pathologist or surgeon must make                                    |
| Deployment and safety            | R        | Sterile interface, operator workflow, fail-safe state, low-confidence output, maintenance schedule, drift monitoring, and software update control                                         | Converts laboratory performance into a usable clinical device or decision-support system                                 |

**Table S2:** Detailed clinical-implementation roadmap for oncologic LIBS. Thresholds are illustrative decision gates that should be adjusted to the clinical task and risk tolerance rather than treated as universal regulatory criteria.

| Stage                                            | Main objective                                                        | Minimum evidence or protocol                                                                                                                             | Practical deployment constraints                                                                                            | Example decision gate to move forward                                                                                                                                            |
|--------------------------------------------------|-----------------------------------------------------------------------|----------------------------------------------------------------------------------------------------------------------------------------------------------|-----------------------------------------------------------------------------------------------------------------------------|----------------------------------------------------------------------------------------------------------------------------------------------------------------------------------|
| Analytical lock-down                             | Stabilize the measurement before clinical claims                      | Fixed sample protocol; laser and gate settings; spectral acceptance criteria; calibration or internal-standard checks; pre-specified preprocessing       | Hydration, blood, surface curvature, sterile covers, substrate lots, instrument warm-up, and operator-to-operator variation | Key-line or index repeatability within the pre-specified tolerance, e.g., between-day RSD $\leq 15\text{--}20\%$ for QC material and $>95\%$ spectra passing quality criteria    |
| Retrospective clinical validation                | Test whether collected specimens contain clinically meaningful signal | Patient-grouped train/test split; pathology labels; class-specific sensitivity/specificity; confidence intervals; failed spectra counted                 | Archived tissue or biofluids may not match the intended fresh or intraoperative state; metadata may be incomplete           | Locked model maintains clinically relevant performance, e.g., patient-level AUC $\geq 0.85$ or sensitivity/specificity no worse than the predefined clinical baseline            |
| External or temporal validation                  | Evaluate generalizability beyond the development set                  | New patients, batch, operator, instrument, or center; model locked before testing; comparison with clinical-reference baselines                          | Batch effects, substrate changes, instrument drift, and acquisition-order effects must be explicitly tested                 | Performance decrement remains within a predefined margin and confidence intervals exclude clinically unacceptable false-negative rates                                           |
| Workflow simulation                              | Determine whether timing and output format fit the clinical task      | End-to-end measurement timing; user interface; confidence thresholds; remeasurement rules; compatibility with sectioning or surgical field               | Turnaround time, sterile handling, OR footprint, smoke or plume extraction, irrigation, and staff responsibilities          | Result reaches surgeon or pathologist before the decision point, e.g., median pulse-to-decision latency $< 1$ s for point feedback or total triage time $<$ frozen-section delay |
| Prospective utility study                        | Determine whether LIBS changes decisions or outcomes                  | Prospective observational or interventional protocol; predefined primary endpoint; safety and false-negative monitoring; operator override               | Human-factors risk, clinical liability, fail-safe design, data recording, and ethics approval                               | Demonstrated improvement in margin orientation, triage efficiency, or diagnostic confidence without exceeding the pre-specified false-negative or adverse-workflow threshold     |
| Regulated multi-center adoption and surveillance | Maintain performance after adoption                                   | Quality-management system; software version control; periodic recalibration; drift monitoring; audit of false positives/negatives; retraining governance | FDA/EU/NMPA pathway, CE or local approval, maintenance, cybersecurity, reimbursement, and cost-effectiveness evidence       | Multicenter prospective performance and health-economic case support the intended use; post-deployment monitoring detects drift and triggers controlled updates                  |
